# Supplementary material for: Meiotic cellular rejuvenation is coupled to nuclear remodeling in budding yeast
Source: PubMed Central journal article supplement (PMC6711709; doi:10.7554/elife.47156), 2019-08-09
Supplement: elife-47156-fig8-data2.pdf [file elife-47156-fig8-data2.pdf]

|                  |   | Number of nuclei with NPC enrichment (% of cells) |       |       |      |      |
|------------------|---|---------------------------------------------------|-------|-------|------|------|
|                  |   | 0                                                 | 1     | 2     | 3    | 4    |
| Number<br>of PMs | 4 | 97.92                                             | 2.08  | 0.00  | 0.00 | 0.00 |
|                  | 3 | 1.25                                              | 96.25 | 2.50  | 0.00 | 0.00 |
|                  | 2 | 0.00                                              | 4.35  | 93.48 | 2.17 | 0.00 |
