# Supplementary material for: Meiotic cellular rejuvenation is coupled to nuclear remodeling in budding yeast
Source: eLife journal article supplement (doi:10.7554/elife.47156), 2019-08-09
Supplement: supp [file elife-47156-supp-v1.zip]

Archive with 51 entries (51 files):
- elife_poa_e47156_Figure_3_figure_supplement_2.pdf
- elife_poa_e47156_Video_3.avi
- elife_poa_e47156_Figure_2_source_data_2.pdf
- elife_poa_e47156_Figure_1_figure_supplement_1.pdf
- elife_poa_e47156_Figure_3_figure_supplement_3.pdf
- elife_poa_e47156_Video_8.mov
- elife_poa_e47156_Figure_3_figure_supplement_5.pdf
- elife_poa_e47156_Figure_5_figure_supplement_2.pdf
- elife_poa_e47156_Figure_7_source_data_2.pdf
- elife_poa_e47156_Supplementary_file_5.docx
- elife_poa_e47156_Supplementary_file_2.docx
- elife_poa_e47156_Video_6.mov
- elife_poa_e47156_Figure_9_figure_supplement_2.pdf
- elife_poa_e47156_Figure_6_figure_supplement_3.pdf
- elife_poa_e47156_Video_4.avi
- elife_poa_e47156_Video_12.avi
- elife_poa_e47156_Figure_4_figure_supplement_1.pdf
- elife_poa_e47156_Figure_8_source_data_1.pdf
- elife_poa_e47156_Video_7.mov
- elife_poa_e47156_Figure_3_figure_supplement_4.pdf
- elife_poa_e47156_Figure_3_figure_supplement_1.pdf
- elife_poa_e47156_Video_11.avi
- elife_poa_e47156_Video_10.avi
- elife_poa_e47156_Figure_8_figure_supplement_2.pdf
- elife_poa_e47156_Supplementary_file_3.docx
- elife_poa_e47156_Video_14.avi
- elife_poa_e47156_Figure_9_figure_supplement_1.pdf
- elife_poa_e47156_Figure_5_figure_supplement_1.pdf
- elife_poa_e47156_Figure_1_source_data_2.pdf
- elife_poa_e47156_Figure_9_source_data_1.pdf
- elife_poa_e47156_Video_5.avi
- elife_poa_e47156_Supplementary_file_4.docx
- elife_poa_e47156_Figure_7_source_data_1.pdf
- elife_poa_e47156_Figure_4_figure_supplement_2.pdf
- elife_poa_e47156_Figure_8_figure_supplement_1.pdf
- elife_poa_e47156_Video_1.avi
- elife_poa_e47156_Figure_8_source_data_2.pdf
- elife_poa_e47156_Figure_9_source_data_2.pdf
- elife_poa_e47156_Transparent_Reporting_File.docx
- elife_poa_e47156_Figure_1_figure_supplement_1_source_data_1.pdf
- elife_poa_e47156_Supplementary_file_1.docx
- elife_poa_e47156_Figure_1_source_data_1.pdf
- elife_poa_e47156_Figure_6_figure_supplement_2.pdf
- elife_poa_e47156_Figure_3_figure_supplement_6.pdf
- elife_poa_e47156_Figure_1_figure_supplement_2.pdf
- elife_poa_e47156_Video_9.mov
- elife_poa_e47156_Video_13.avi
- elife_poa_e47156_Video_2.avi
- elife_poa_e47156_Figure_2_source_data_1.pdf
- elife_poa_e47156_Figure_2_source_data_3.pdf
- elife_poa_e47156_Figure_6_figure_supplement_1.pdf
