# Supplementary material for: Meiotic cellular rejuvenation is coupled to nuclear remodeling in budding yeast
Source: eLife journal article supplement (doi:10.7554/elife.47156), 2019-08-09
Supplement: supp [file elife-47156-supp-v1.zip › elife_poa_e47156_Figure_1_figure_supplement_1_source_data_1.pdf]

|                           | Percent of cells |
|---------------------------|------------------|
| Aggregate inside nucleus  | 96               |
| Aggregate outside nucleus | 4                |
