# Supplementary material for: Meiotic cellular rejuvenation is coupled to nuclear remodeling in budding yeast
Source: eLife journal article supplement (doi:10.7554/elife.47156), 2019-08-09
Supplement: supp [file elife-47156-supp-v1.zip › elife_poa_e47156_Figure_1_source_data_2.pdf]

| Time of rDNA circle sequestration relative to anaphase II onset (min) | Percent of aged cells |
|-----------------------------------------------------------------------|-----------------------|
| -45                                                                   | 0                     |
| -30                                                                   | 0                     |
| -15                                                                   | 0                     |
| 0                                                                     | 2                     |
| 15                                                                    | 52                    |
| 30                                                                    | 96                    |
| 45                                                                    | 100                   |
| 60                                                                    | 100                   |
