# Supplementary material for: Meiotic cellular rejuvenation is coupled to nuclear remodeling in budding yeast
Source: eLife journal article supplement (doi:10.7554/elife.47156), 2019-08-09
Supplement: supp [file elife-47156-supp-v1.zip › elife_poa_e47156_Figure_2_source_data_2.pdf]

|                          | Number of generations (age) |       |       |
|--------------------------|-----------------------------|-------|-------|
|                          | 0-4                         | 5-8   | 9+    |
| percent Nsr1 sequestered | 21.63                       | 32.06 | 56.10 |
|                          | 21.96                       | 27.39 | 63.11 |
|                          | 24.93                       | 29.87 | 26.56 |
|                          | 29.21                       | 20.75 | 56.35 |
|                          | 28.98                       | 22.11 | 64.57 |
|                          | 17.70                       | 53.80 | 20.92 |
|                          | 15.54                       | 34.63 | 26.05 |
|                          | 18.03                       | 43.71 | 47.01 |
|                          | 11.55                       | 18.97 | 58.99 |
|                          | 28.42                       | 41.56 | 39.36 |
|                          | 8.47                        | 26.26 | 47.33 |
|                          | 24.76                       | 47.48 | 84.58 |
|                          | 14.79                       | 34.44 | 17.06 |
|                          | 17.78                       | 46.08 | 40.87 |
|                          | 24.57                       | 55.88 | 25.95 |
|                          | 19.58                       | 36.50 | 59.69 |
|                          | 31.83                       | 24.23 | 55.04 |
|                          | 20.63                       | 28.12 | 29.14 |
|                          | 26.16                       | 26.12 | 28.09 |
|                          | 15.22                       | 47.19 | 27.82 |
|                          | 57.45                       | 61.08 | 22.54 |
|                          | 26.32                       | 22.70 | 51.33 |
|                          | 22.78                       | 28.83 | 21.03 |
|                          | 30.45                       | 59.56 | 23.56 |
|                          | 19.26                       | 60.35 | 27.72 |
|                          | 23.22                       | 61.22 | 51.27 |
|                          | 21.09                       | 26.51 | 23.60 |
|                          | 14.38                       | 37.41 | 32.75 |
|                          | 26.35                       | 67.65 | 67.82 |
|                          | 20.39                       | 66.01 | 46.38 |
|                          | 19.87                       | 44.18 | 14.87 |
|                          | 13.57                       | 33.20 | 32.20 |
|                          | 33.24                       | 20.62 | 14.70 |
|                          | 21.77                       | 11.85 | 28.40 |
|                          | 34.42                       | 21.26 | 24.13 |
|                          | 9.08                        | 21.35 | 49.65 |
|                          | 24.44                       | 23.39 | 73.66 |
|                          | 21.63                       | 34.47 | 45.59 |
|                          | 22.33                       | 26.60 | 78.81 |
|                          | 13.71                       | 30.46 | 43.17 |
|                          | 21.74                       | 34.08 | 32.02 |
|                          | 14.57                       | 30.15 | 21.17 |
|                          | 39.00                       | 10.62 | 28.08 |
|                          | 6.65                        | 25.44 | 53.95 |
|                          | 33.30                       | 42.15 | 31.36 |
|                          | 22.39                       | 36.81 | 42.61 |
|                          | 39.53                       | 58.05 | 67.97 |
|                          | 25.74                       | 28.22 | 53.36 |
|                          | 18.20                       | 34.21 | 76.65 |
|                          | 15.28                       | 40.19 |       |
|                          |                             | 34.49 |       |
|                          |                             | 65.74 |       |
|                          |                             | 32.98 |       |
