# Supplementary material for: Meiotic cellular rejuvenation is coupled to nuclear remodeling in budding yeast
Source: eLife journal article supplement (doi:10.7554/elife.47156), 2019-08-09
Supplement: supp [file elife-47156-supp-v1.zip › elife_poa_e47156_Figure_2_source_data_3.pdf]

|                                   | Percent of cells |
|-----------------------------------|------------------|
| Nsr1 and Hsp104 foci adjacent     | 86               |
| Nsr1 and Hsp104 foci not adjacent | 14               |
