# Supplementary material for: Meiotic cellular rejuvenation is coupled to nuclear remodeling in budding yeast
Source: eLife journal article supplement (doi:10.7554/elife.47156), 2019-08-09
Supplement: supp [file elife-47156-supp-v1.zip › elife_poa_e47156_Figure_7_source_data_1.pdf]

| Time of Nup170 clearance relative to vacuolar lysis (min) | Percent of young cells |
|-----------------------------------------------------------|------------------------|
| -120                                                      | 0.00                   |
| -105                                                      | 0.00                   |
| -90                                                       | 0.00                   |
| -75                                                       | 0.00                   |
| -60                                                       | 0.00                   |
| -45                                                       | 0.71                   |
| -30                                                       | 5.67                   |
| -15                                                       | 17.73                  |
| 0                                                         | 85.11                  |
| 15                                                        | 97.87                  |
| 30                                                        | 99.29                  |
| 45                                                        | 99.29                  |
| 60                                                        | 99.29                  |
| 75                                                        | 99.29                  |
| 90                                                        | 99.29                  |
| 105                                                       | 99.29                  |
| 120                                                       | 100.00                 |
