# Supplementary material for: Meiotic cellular rejuvenation is coupled to nuclear remodeling in budding yeast
Source: eLife journal article supplement (doi:10.7554/elife.47156), 2019-08-09
Supplement: supp [file elife-47156-supp-v1.zip › elife_poa_e47156_Figure_7_source_data_2.pdf]

| Time of protein aggregate clearance relative to vacuolar lysis (min) | Percent of aged cells |
|----------------------------------------------------------------------|-----------------------|
| -240                                                                 | 0                     |
| -225                                                                 | 1                     |
| -150                                                                 | 2                     |
| -135                                                                 | 3                     |
| -120                                                                 | 5                     |
| -90                                                                  | 7                     |
| -75                                                                  | 9                     |
| -60                                                                  | 12                    |
| -45                                                                  | 20                    |
| -30                                                                  | 31                    |
| -15                                                                  | 48                    |
| 0                                                                    | 99                    |
| 15                                                                   | 99                    |
| 30                                                                   | 99                    |
| 45                                                                   | 99                    |
| 60                                                                   | 99                    |
| 75                                                                   | 100                   |
| 240                                                                  | 100                   |
