# Supplementary material for: Meiotic cellular rejuvenation is coupled to nuclear remodeling in budding yeast
Source: eLife journal article supplement (doi:10.7554/elife.47156), 2019-08-09
Supplement: supp [file elife-47156-supp-v1.zip › elife_poa_e47156_Figure_8_source_data_1.pdf]

|               | Number of nuclei with NPC enrichment (% of cells) |       |      |      |       |
|---------------|---------------------------------------------------|-------|------|------|-------|
|               | 0                                                 | 1     | 2    | 3    | 4     |
| WT            | 74.07                                             | 20.37 | 4.63 | 0.93 | 0.00  |
| <i>spo21Δ</i> | 0.00                                              | 0.00  | 0.85 | 4.24 | 94.92 |
