# Supplementary material for: Meiotic cellular rejuvenation is coupled to nuclear remodeling in budding yeast
Source: eLife journal article supplement (doi:10.7554/elife.47156), 2019-08-09
Supplement: supp [file elife-47156-supp-v1.zip › elife_poa_e47156_Figure_8_source_data_2.pdf]

|                   |   | Number of nuclei with NPC enrichment (% of cells) |       |       |      |      |
|-------------------|---|---------------------------------------------------|-------|-------|------|------|
|                   |   | 0                                                 | 1     | 2     | 3    | 4    |
| Number<br>of PSMs | 4 | 97.92                                             | 2.08  | 0.00  | 0.00 | 0.00 |
|                   | 3 | 1.25                                              | 96.25 | 2.50  | 0.00 | 0.00 |
|                   | 2 | 0.00                                              | 4.35  | 93.48 | 2.17 | 0.00 |
