# Supplementary material for: Meiotic cellular rejuvenation is coupled to nuclear remodeling in budding yeast
Source: eLife journal article supplement (doi:10.7554/elife.47156), 2019-08-09
Supplement: supp [file elife-47156-supp-v1.zip › elife_poa_e47156_Figure_9_source_data_1.pdf]

|               | Percent of aged cells |                    |
|---------------|-----------------------|--------------------|
|               | Aggregate sequestered | Aggregate retained |
| WT            | 100                   | 0                  |
| <i>spo21Δ</i> | 52                    | 48                 |
