# Supplementary material for: Meiotic cellular rejuvenation is coupled to nuclear remodeling in budding yeast
Source: eLife journal article supplement (doi:10.7554/elife.47156), 2019-08-09
Supplement: supp [file elife-47156-supp-v1.zip › elife_poa_e47156_Figure_9_source_data_2.pdf]

|               | Percent of young cells |               |
|---------------|------------------------|---------------|
|               | Nsr1 sequestered       | Nsr1 retained |
| WT            | 100                    | 0             |
| <i>spo21Δ</i> | 61                     | 39            |
