# Supplementary figures and images for: Meiotic cellular rejuvenation is coupled to nuclear remodeling in budding yeast
Source: eLife journal article supplement (doi:10.7554/elife.47156), 2019-08-09

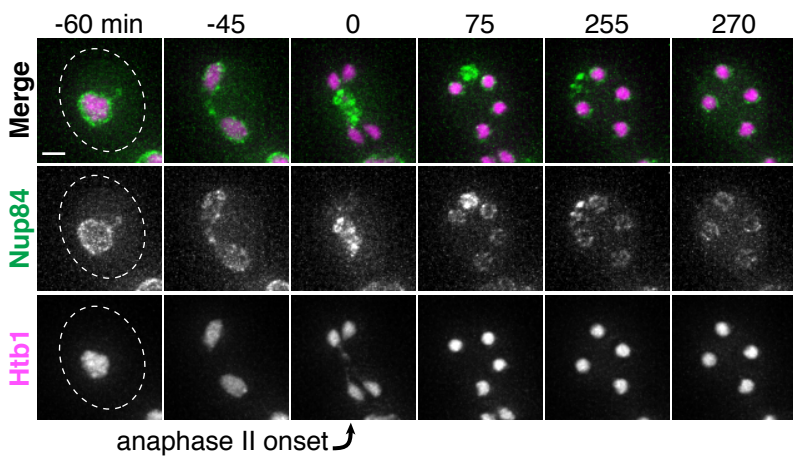

Supplement: supp [file elife-47156-supp-v1.zip › elife_poa_e47156_Figure_3_figure_supplement_2.pdf]

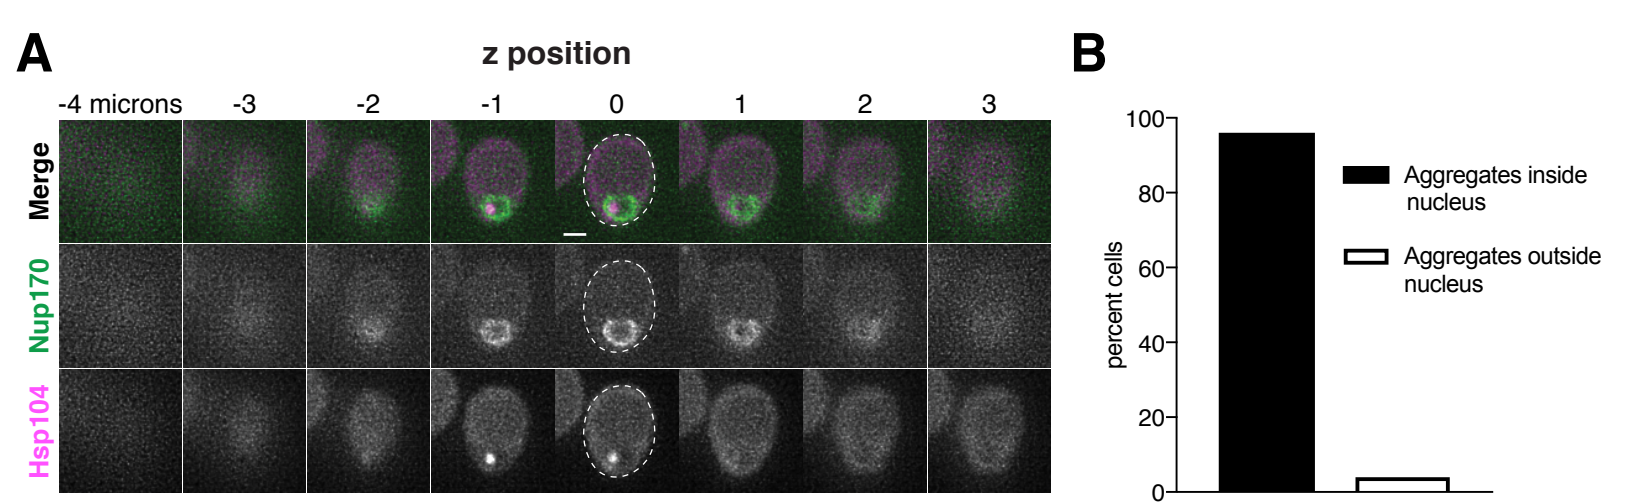

Supplement: supp [file elife-47156-supp-v1.zip › elife_poa_e47156_Figure_1_figure_supplement_1.pdf]

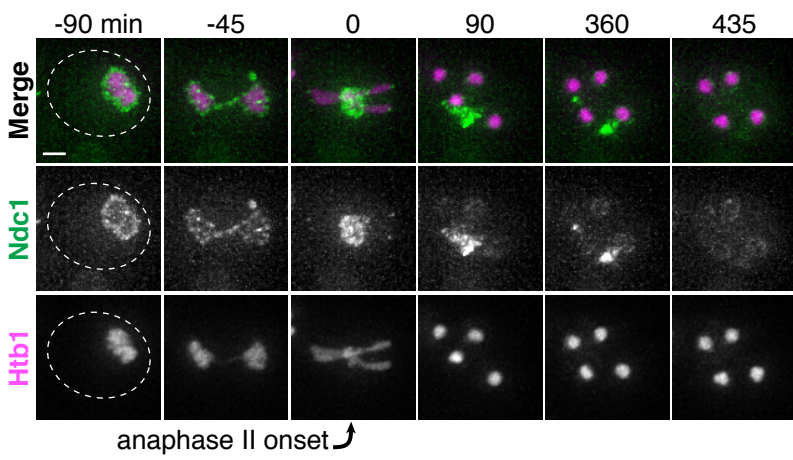

Supplement: supp [file elife-47156-supp-v1.zip › elife_poa_e47156_Figure_3_figure_supplement_3.pdf]

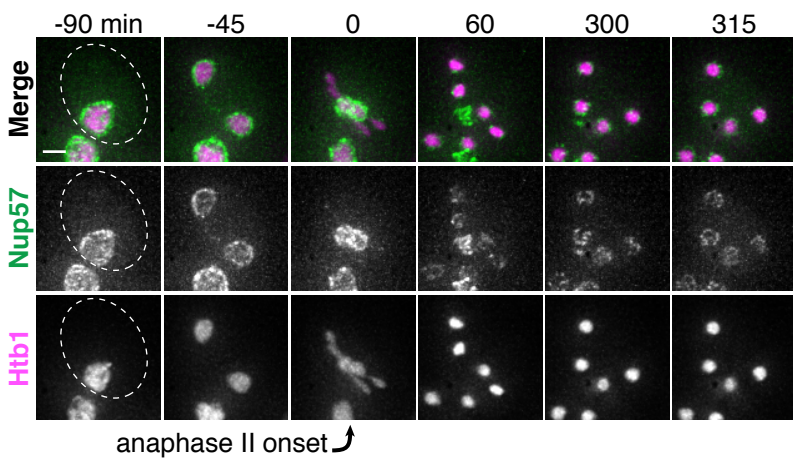

Supplement: supp [file elife-47156-supp-v1.zip › elife_poa_e47156_Figure_3_figure_supplement_5.pdf]

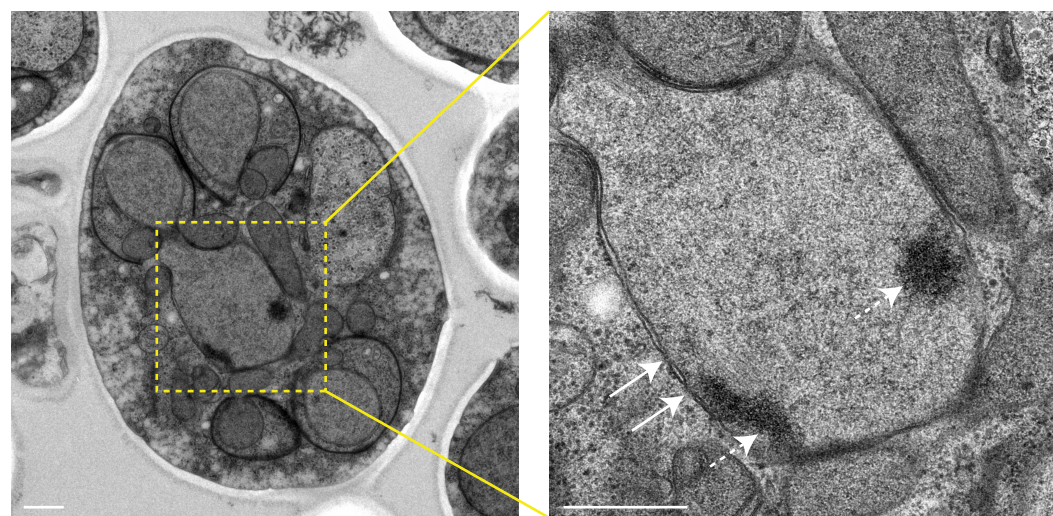

Supplement: supp [file elife-47156-supp-v1.zip › elife_poa_e47156_Figure_5_figure_supplement_2.pdf]

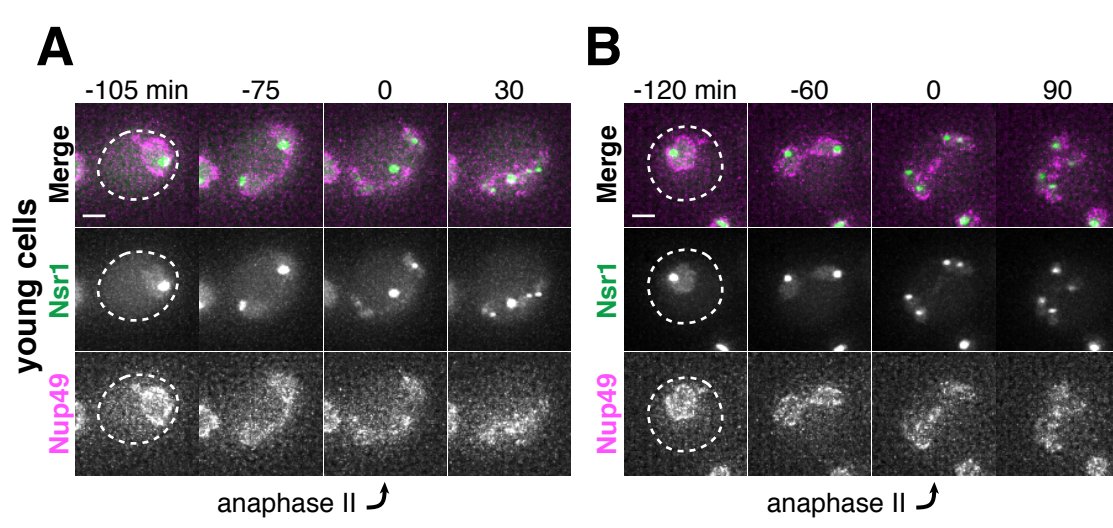

Supplement: supp [file elife-47156-supp-v1.zip › elife_poa_e47156_Figure_9_figure_supplement_2.pdf]

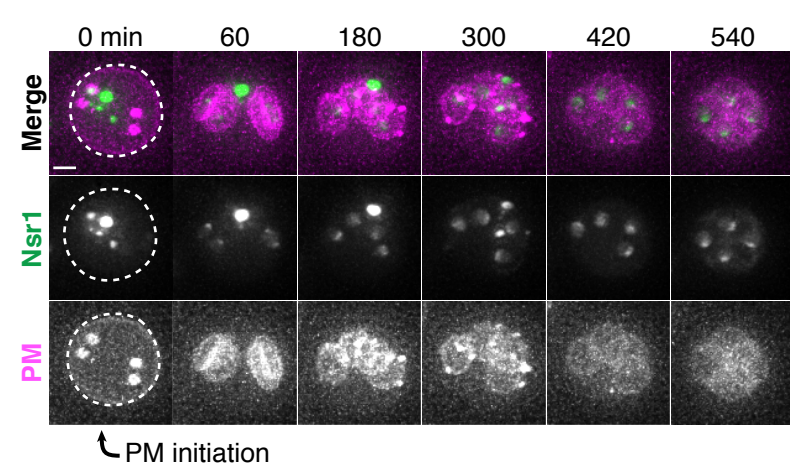

Supplement: supp [file elife-47156-supp-v1.zip › elife_poa_e47156_Figure_6_figure_supplement_3.pdf]

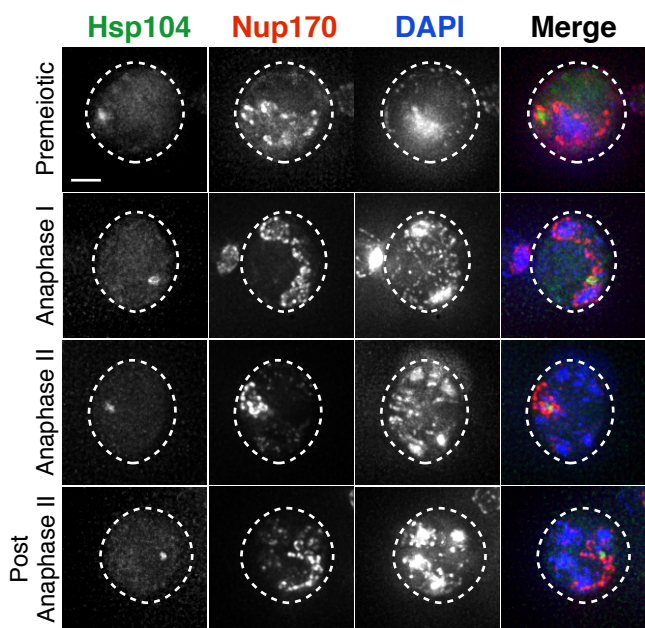

Supplement: supp [file elife-47156-supp-v1.zip › elife_poa_e47156_Figure_4_figure_supplement_1.pdf]

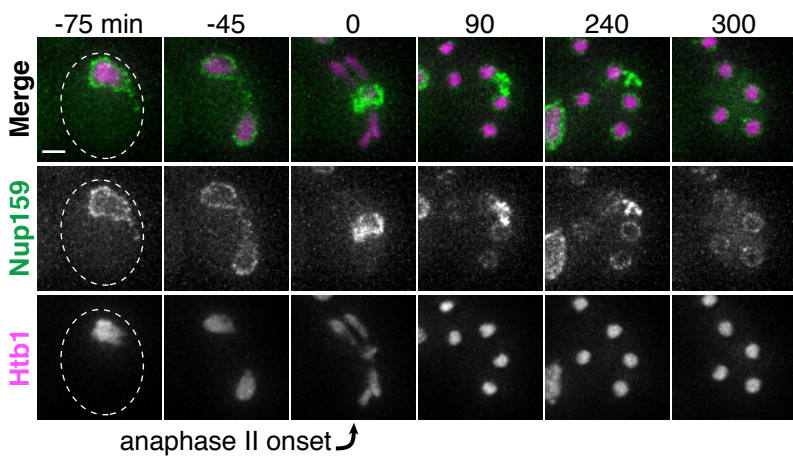

Supplement: supp [file elife-47156-supp-v1.zip › elife_poa_e47156_Figure_3_figure_supplement_4.pdf]

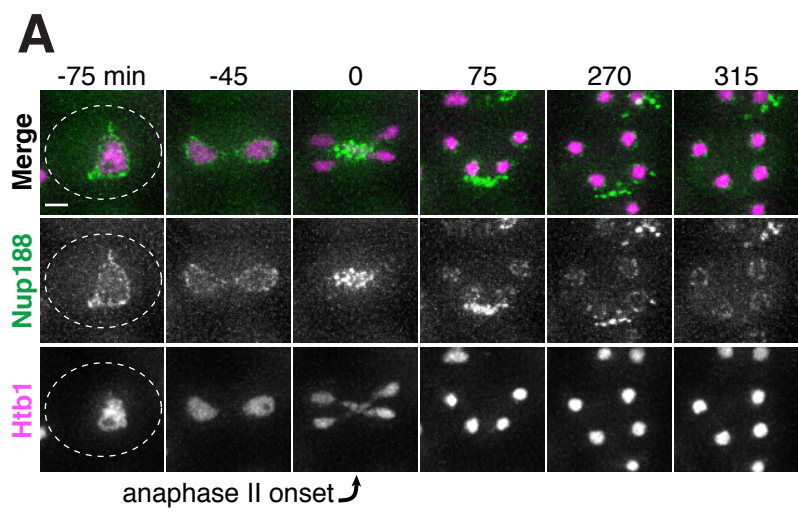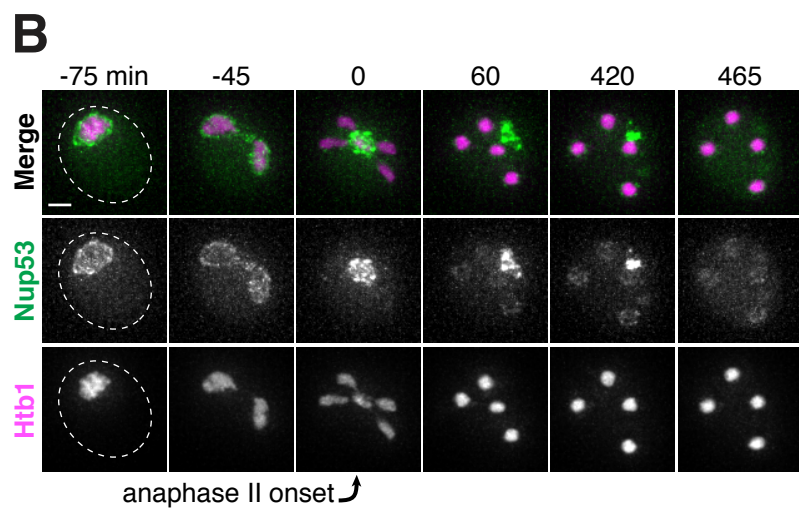

Supplement: supp [file elife-47156-supp-v1.zip › elife_poa_e47156_Figure_3_figure_supplement_1.pdf]

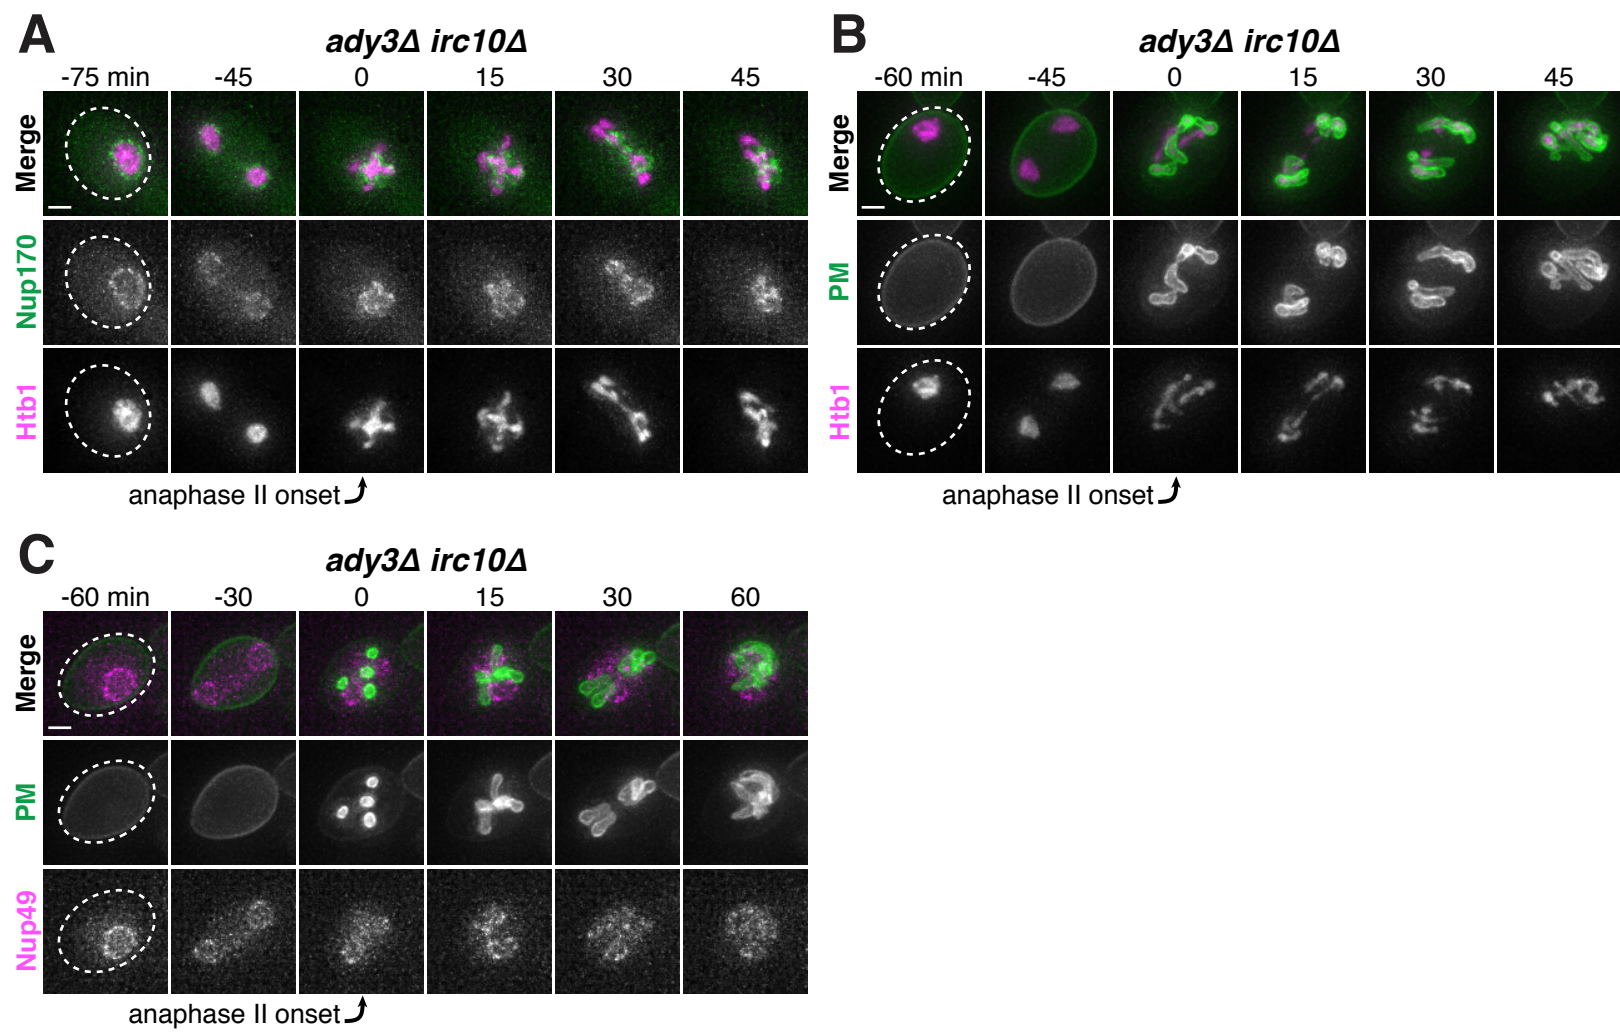

Supplement: supp [file elife-47156-supp-v1.zip › elife_poa_e47156_Figure_8_figure_supplement_2.pdf]

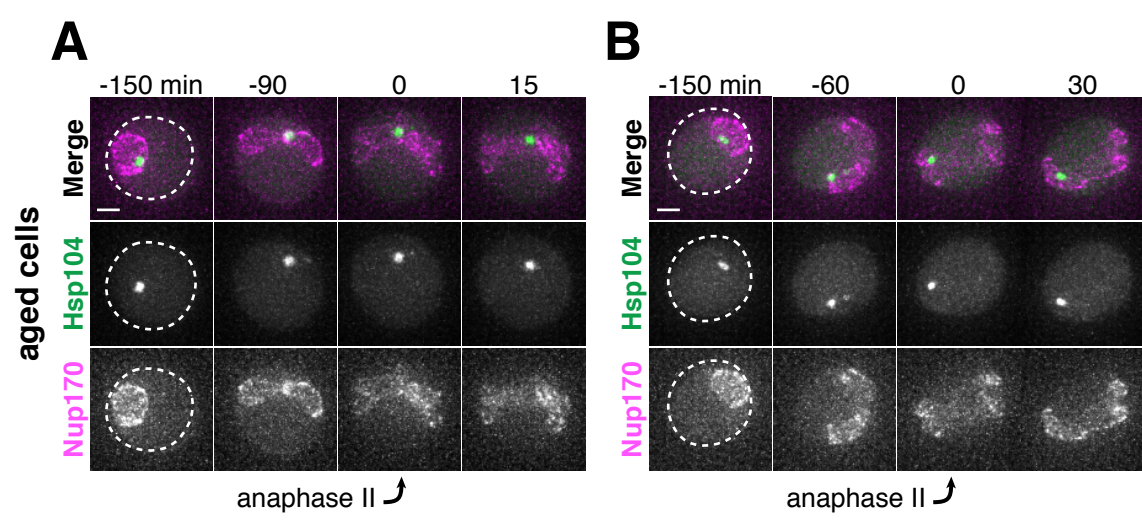

Supplement: supp [file elife-47156-supp-v1.zip › elife_poa_e47156_Figure_9_figure_supplement_1.pdf]

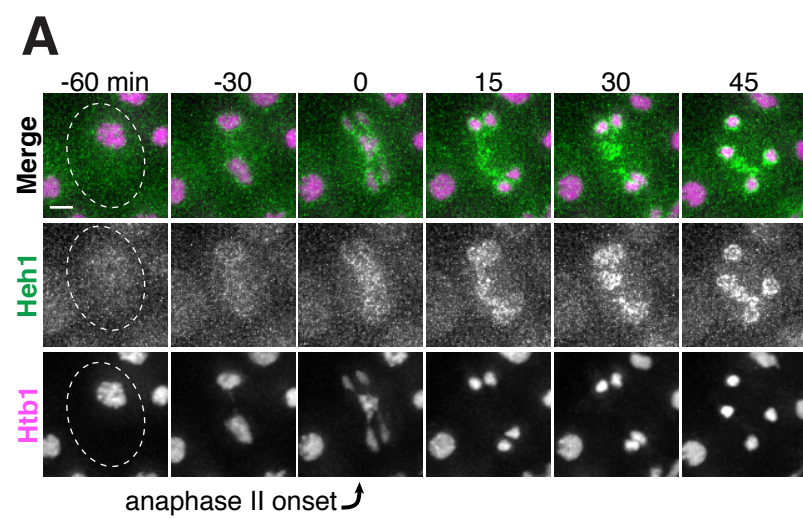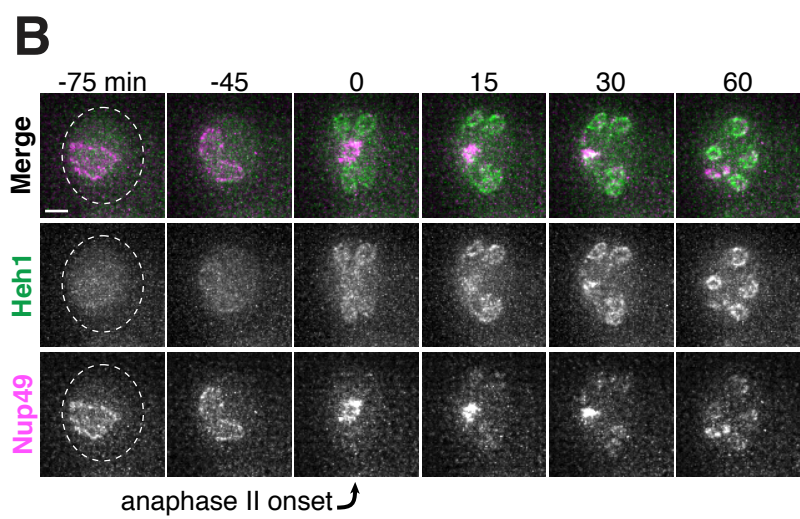

Supplement: supp [file elife-47156-supp-v1.zip › elife_poa_e47156_Figure_5_figure_supplement_1.pdf]

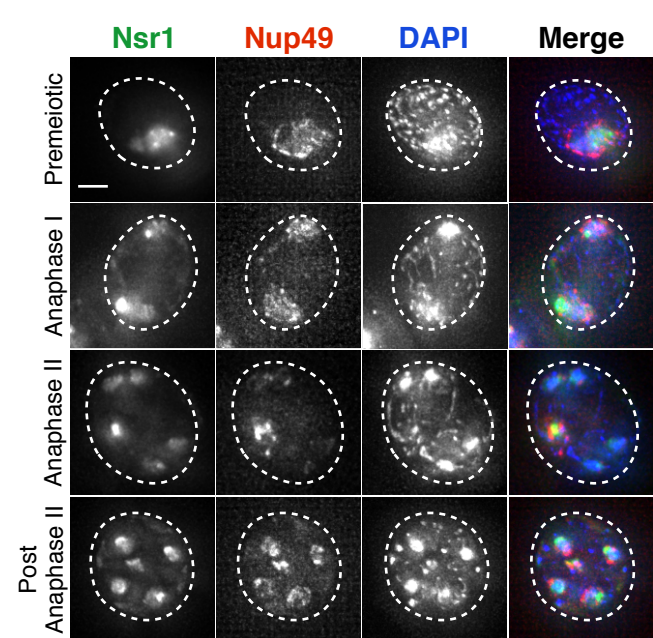

Supplement: supp [file elife-47156-supp-v1.zip › elife_poa_e47156_Figure_4_figure_supplement_2.pdf]

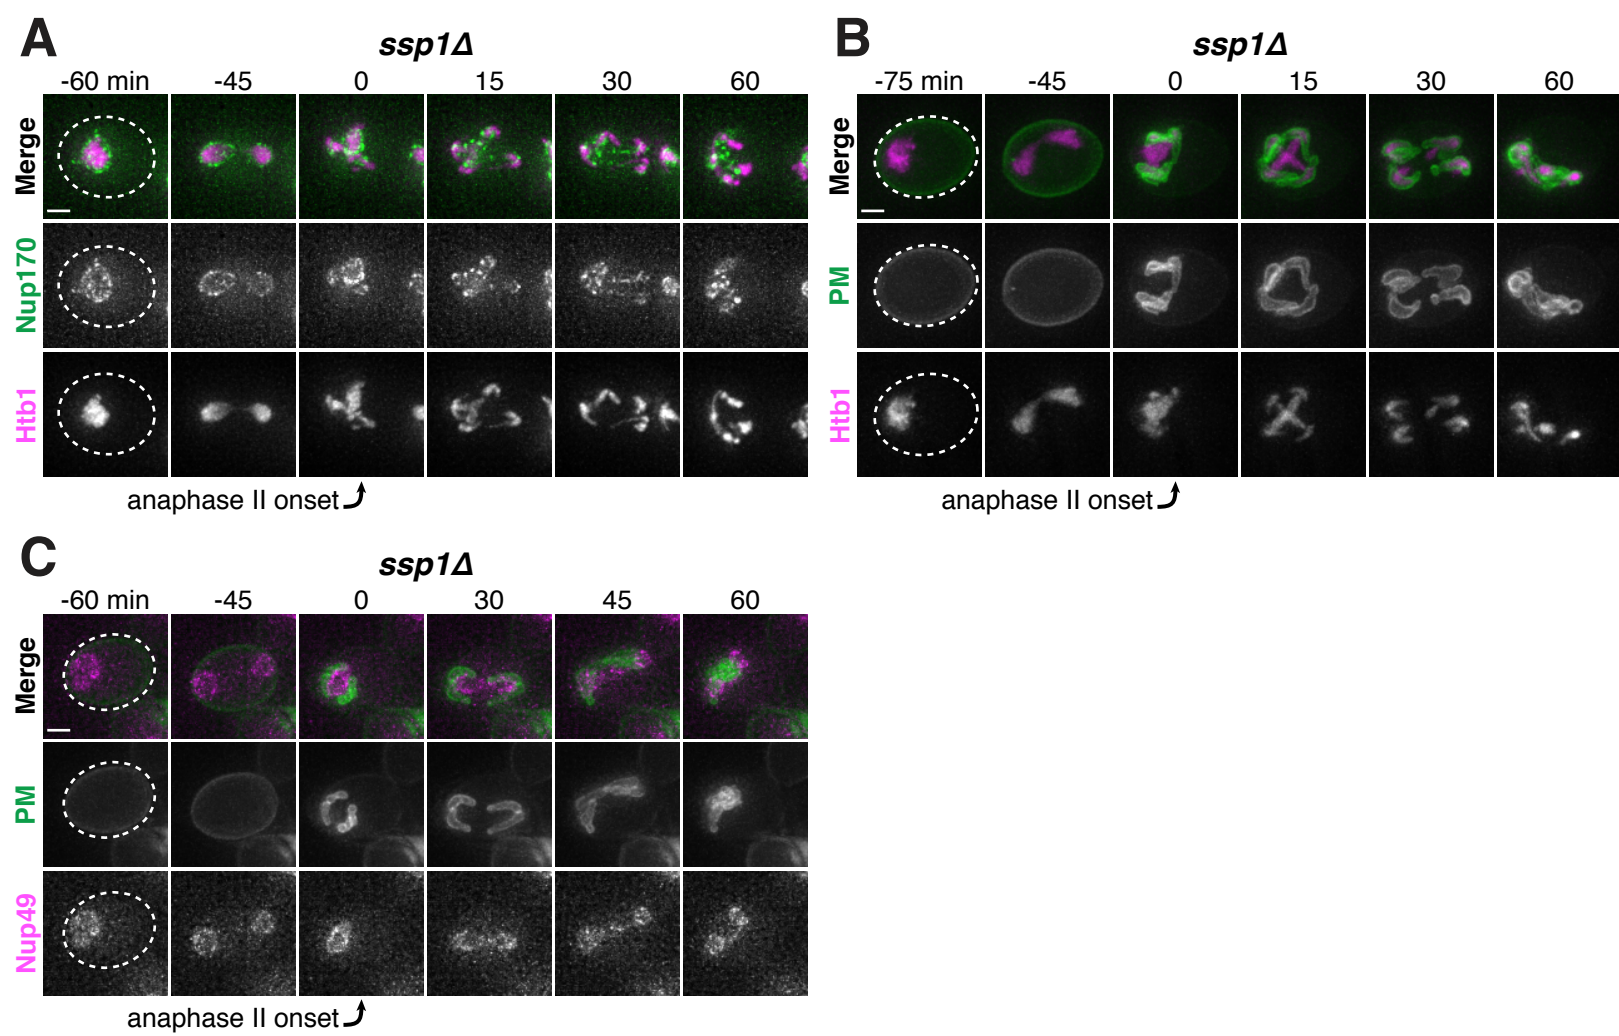

Supplement: supp [file elife-47156-supp-v1.zip › elife_poa_e47156_Figure_8_figure_supplement_1.pdf]

**A**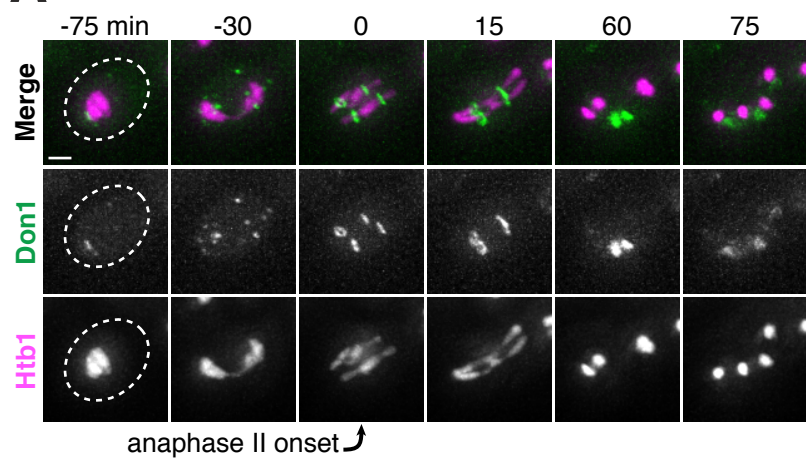**B**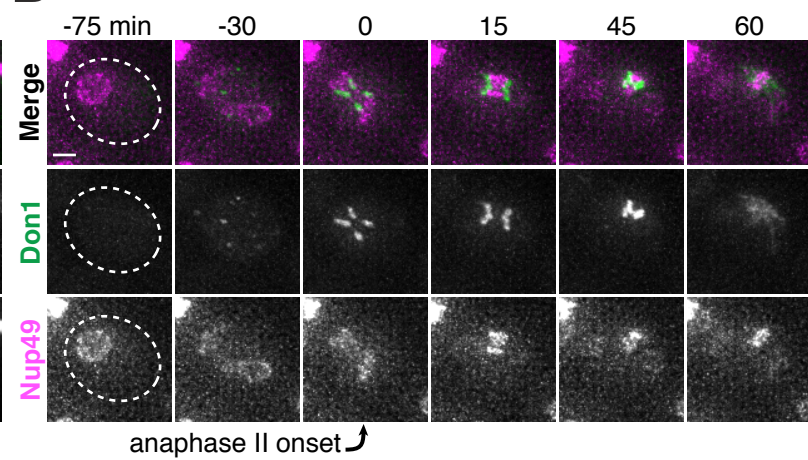

Supplement: supp [file elife-47156-supp-v1.zip › elife_poa_e47156_Figure_6_figure_supplement_2.pdf]

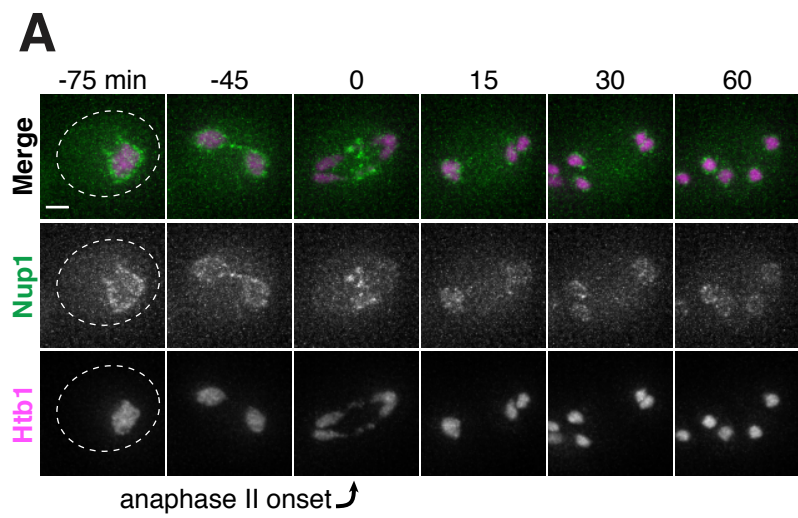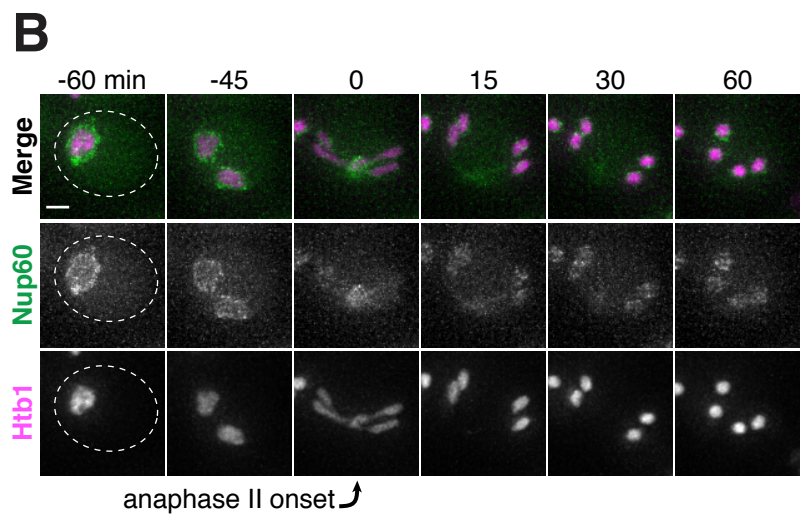

Supplement: supp [file elife-47156-supp-v1.zip › elife_poa_e47156_Figure_3_figure_supplement_6.pdf]

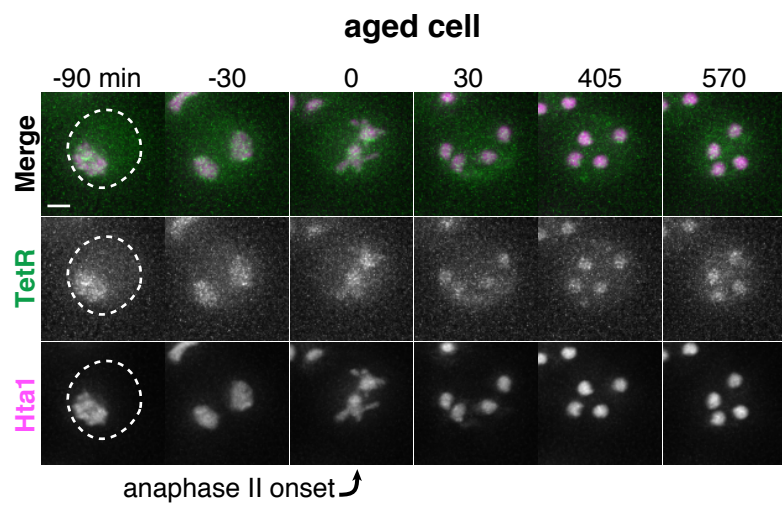

Supplement: supp [file elife-47156-supp-v1.zip › elife_poa_e47156_Figure_1_figure_supplement_2.pdf]

**A**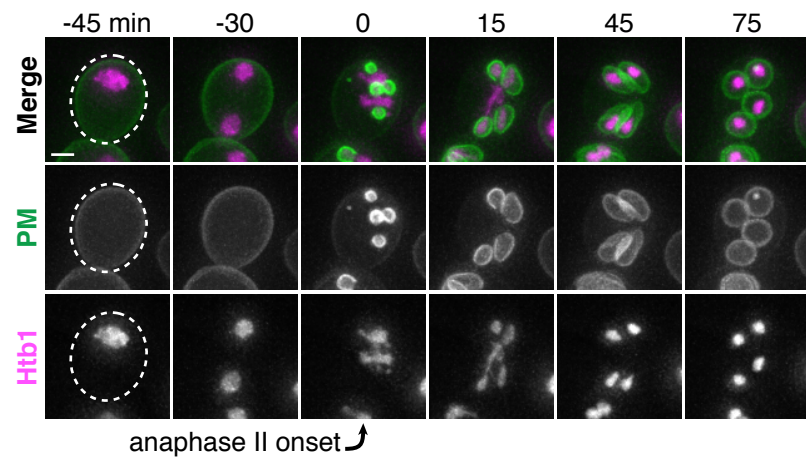**B**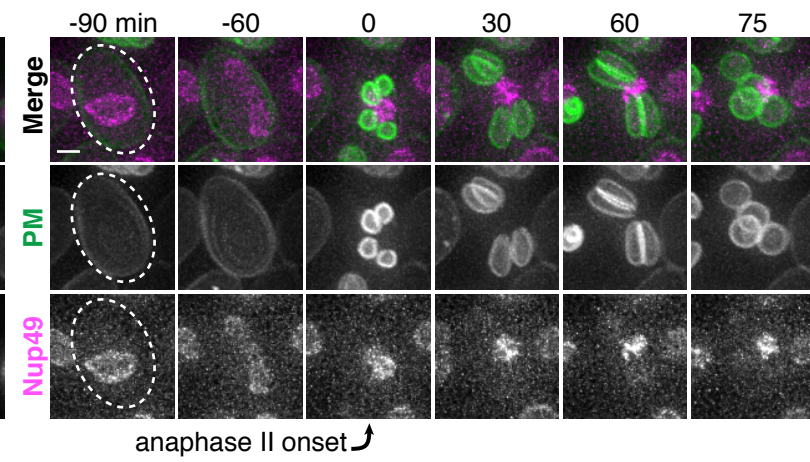

Supplement: supp [file elife-47156-supp-v1.zip › elife_poa_e47156_Figure_6_figure_supplement_1.pdf]
